# Supplementary material
Source: Royal Society of Chemistry journal article supplement (doi:10.1039/d6tb00203j)
Supplement: d6tb00203j1.pdf [file d6tb00203j1.pdf]

## Support information

### **Peptide Dendritic Polymerization-Enabled Stable and Tailorable Nanoparticles as Crosslinkers for Fabricating Multifunctional Hydrogels with Enhanced Wound Healing Efficacy**

Haonan Ye,<sup>a</sup> Zhanshan Gao,<sup>a</sup> Yin Liu,<sup>a</sup> Jiahao Liu,<sup>a</sup> Tianzi Chen,<sup>a</sup> Yueting Wei,<sup>a</sup>  
Han Zhao<sup>a</sup> and Dongdong Wu<sup>\*a</sup>

<sup>a</sup> National Engineering Research Center for Biomaterials, College of Biomedical Engineering, Sichuan University, Chengdu 610064, China

E-mail: wudd@scu.edu.cn.

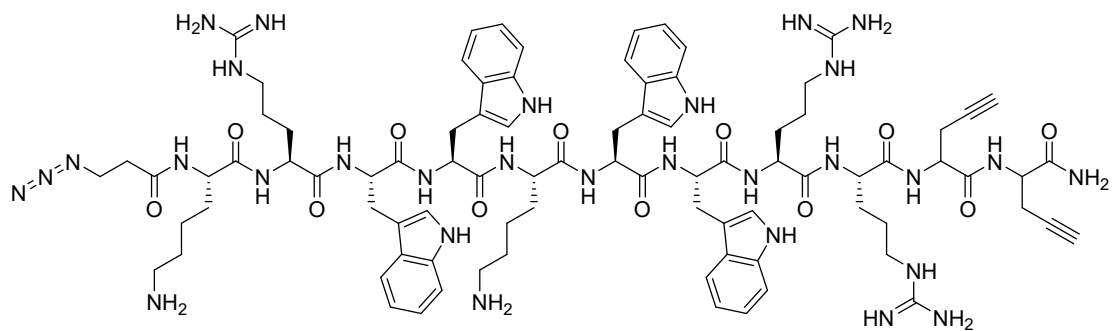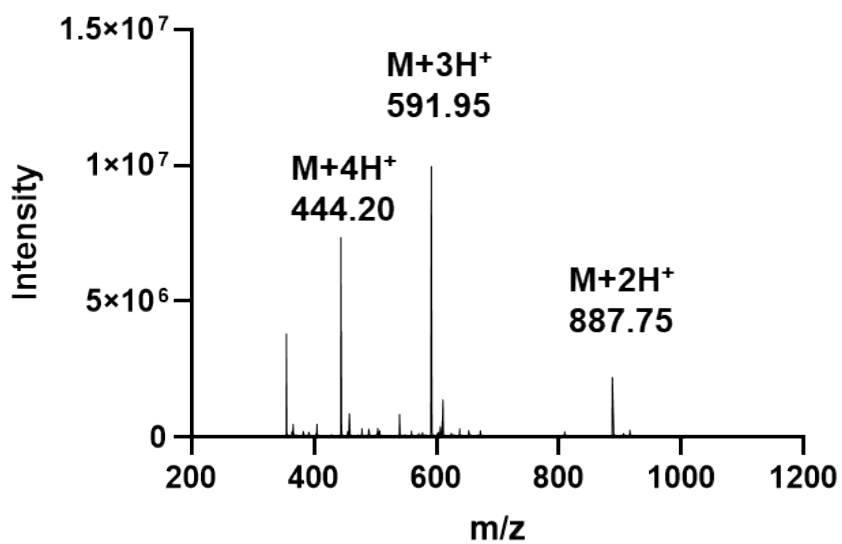

**Figure S1.** Mass spectrometric analysis of AB<sub>2</sub>-type cationic peptide (CP) bearing an azide group at N-termini and two alkyne moieties at C-termini.

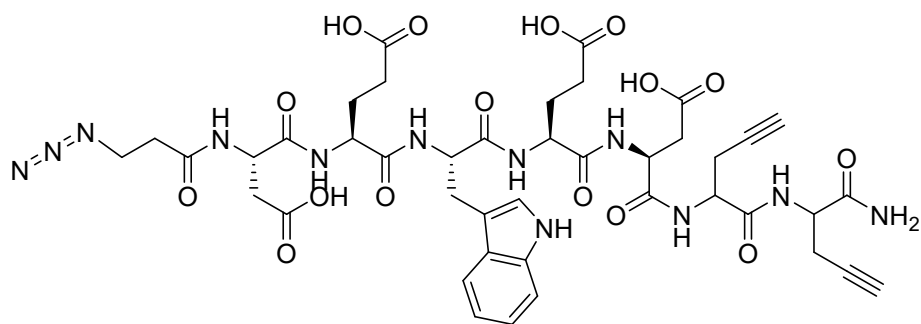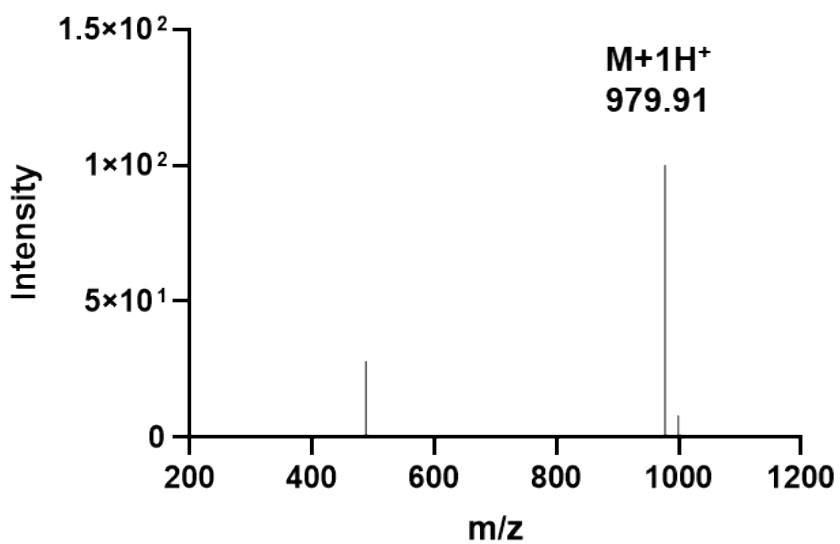

**Figure S2.** Mass spectrometric analysis of AB<sub>2</sub>-type anionic peptide (AP) bearing an azide group at N-termini and two alkyne moieties at C-termini.

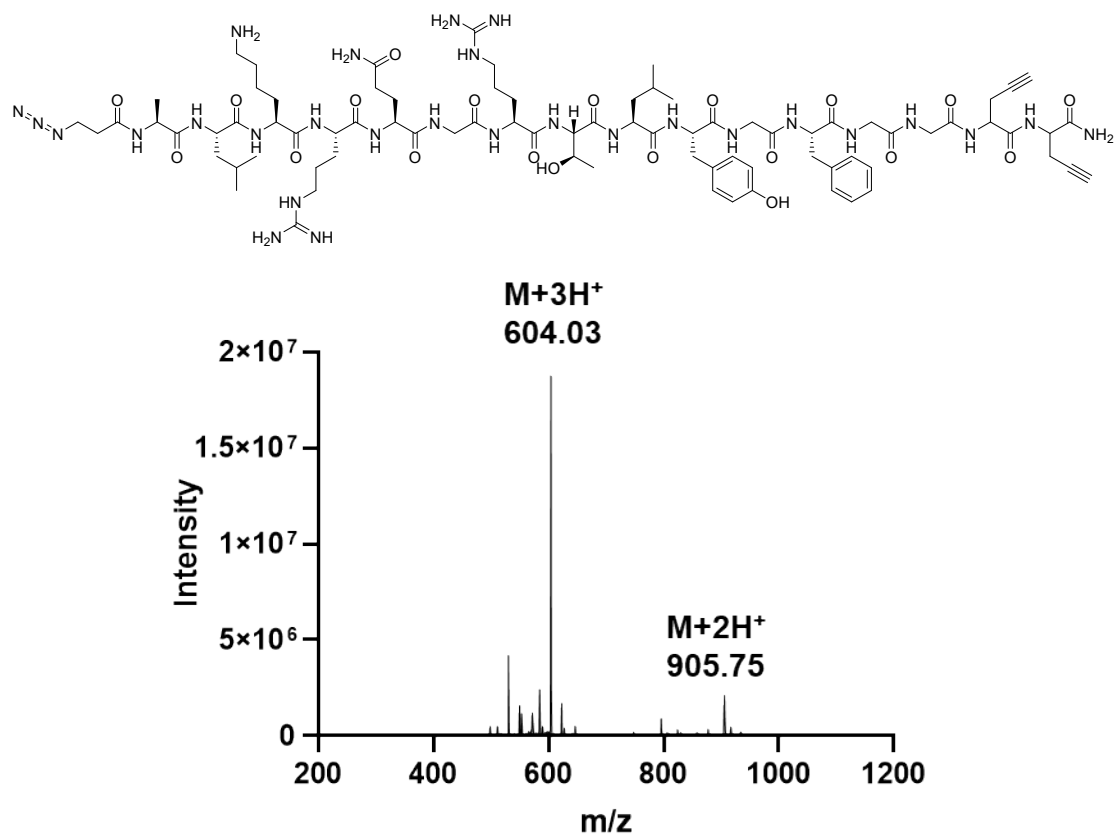

**Figure S3.** Mass spectrometric analysis of AB<sub>2</sub>-type osteogenic growth peptide (OGP) bearing an azide group at N-termini and two alkyne moieties at C-termini.



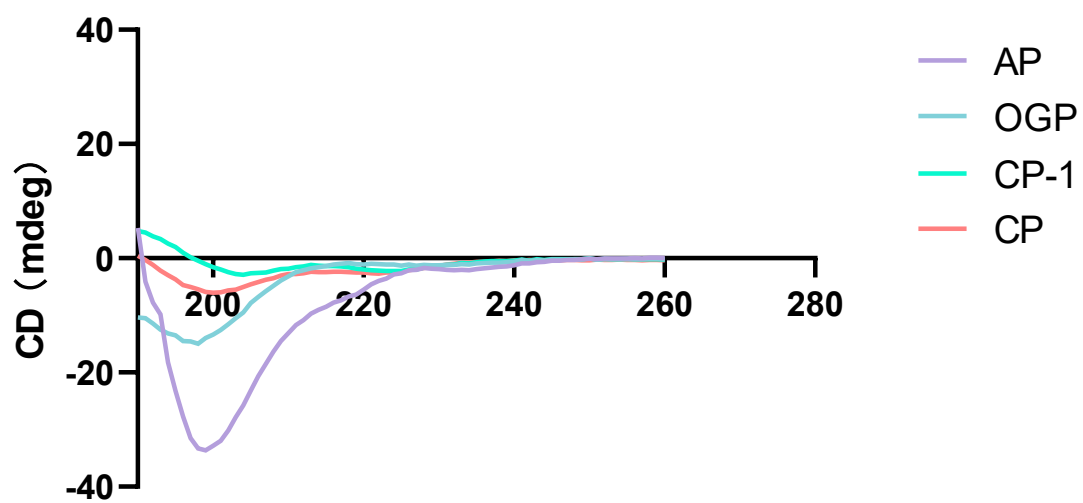

Figure S5. CD spectra of different peptides.

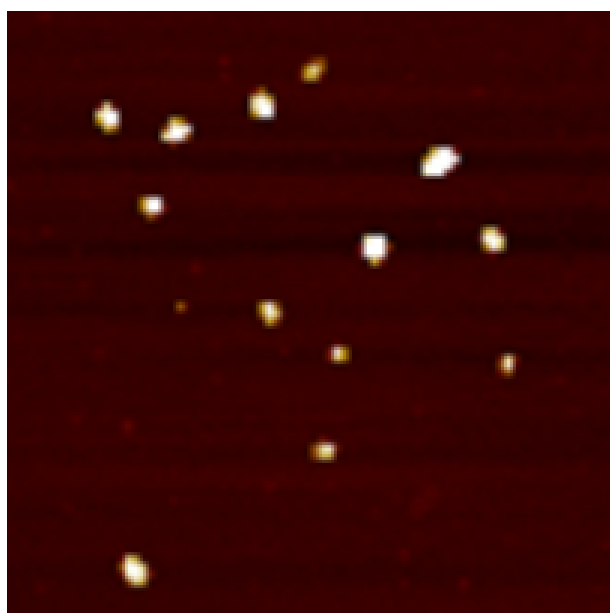

**Figure S6.** AFM image of cationic peptide nanoparticles (CPN).

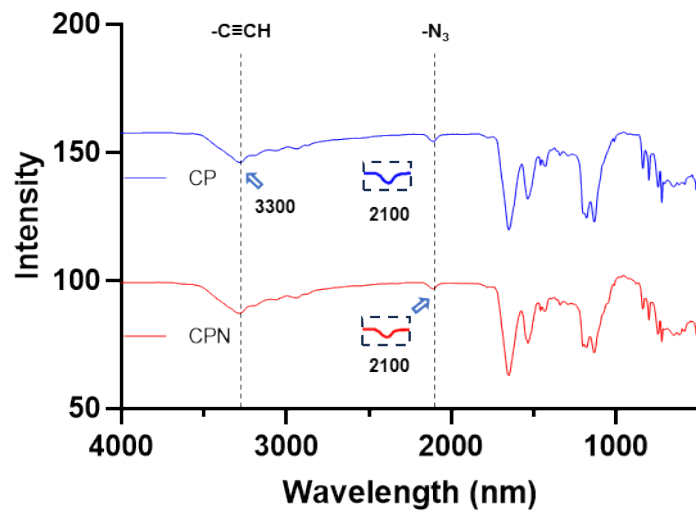

**Figure S7.** FT-IR spectra of CP and CPN.

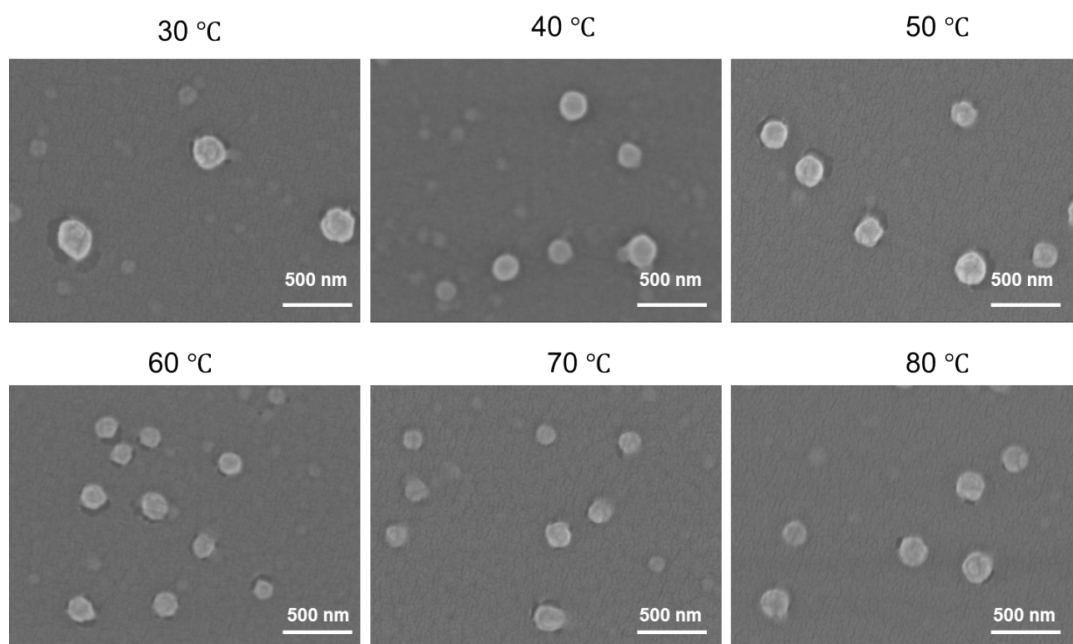

**Figure S8.** SEM images of CPN at different temperatures.

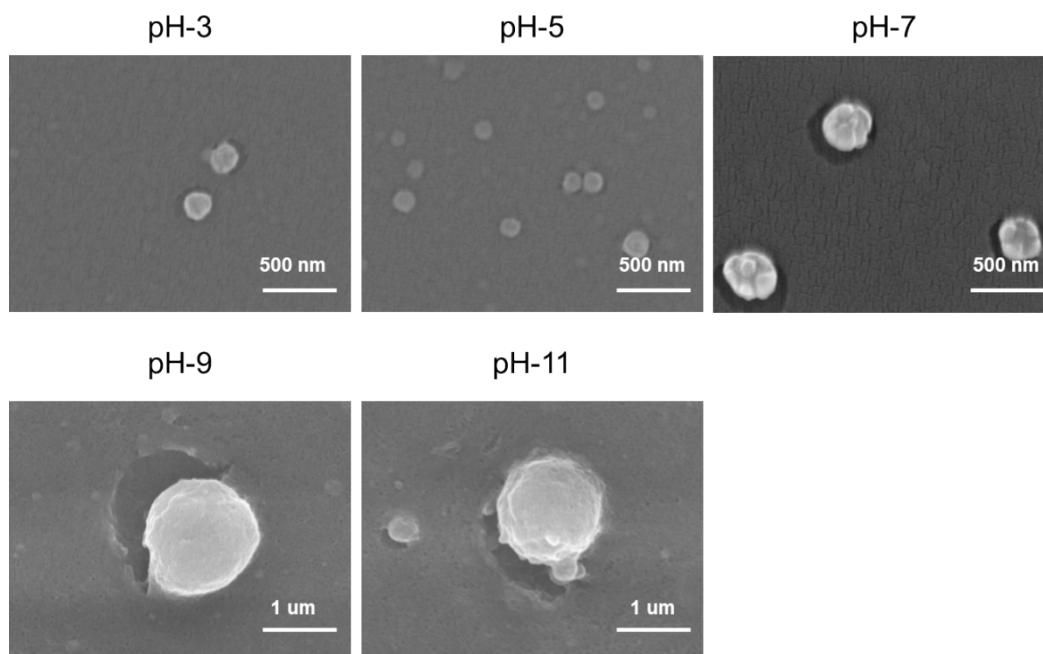

**Figure S9.** SEM images of CPN at different pH values.

| Peptide type     | Peptide sequence | A group | B group   |
|------------------|------------------|---------|-----------|
| Cationic (CP)    | KRWWKWWRR        | Azide   | Alkyne    |
| Anionic (AP)     | DEWED            | Azide   | Alkyne    |
| Osteogenic (OGP) | ALKRQGRTLYGFGG   | Azide   | Alkyne    |
| Cationic (CP-1)  | KRWWKWWRR        | Thio    | Maleimide |

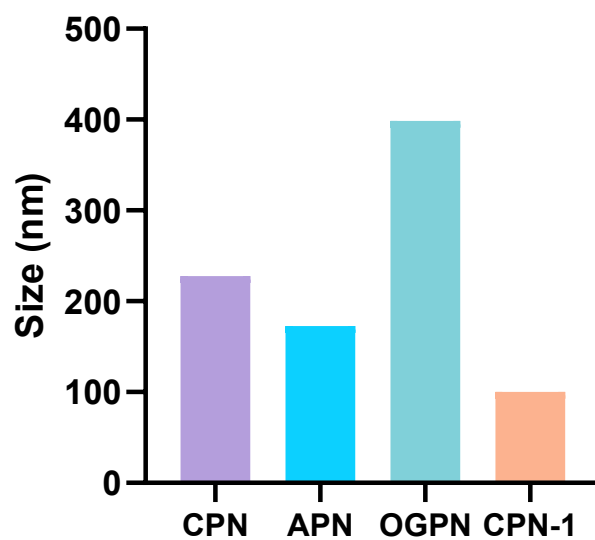

**Figure S10.** The average diameters of different peptide nanoparticles. Error bars represent standard deviation. For CPN, APN, and OGP, data were obtained from DLS measurements ( $n = 3$ ). For CPN-1, the diameter was determined by statistical analysis of TEM images ( $n \geq 50$  particles).

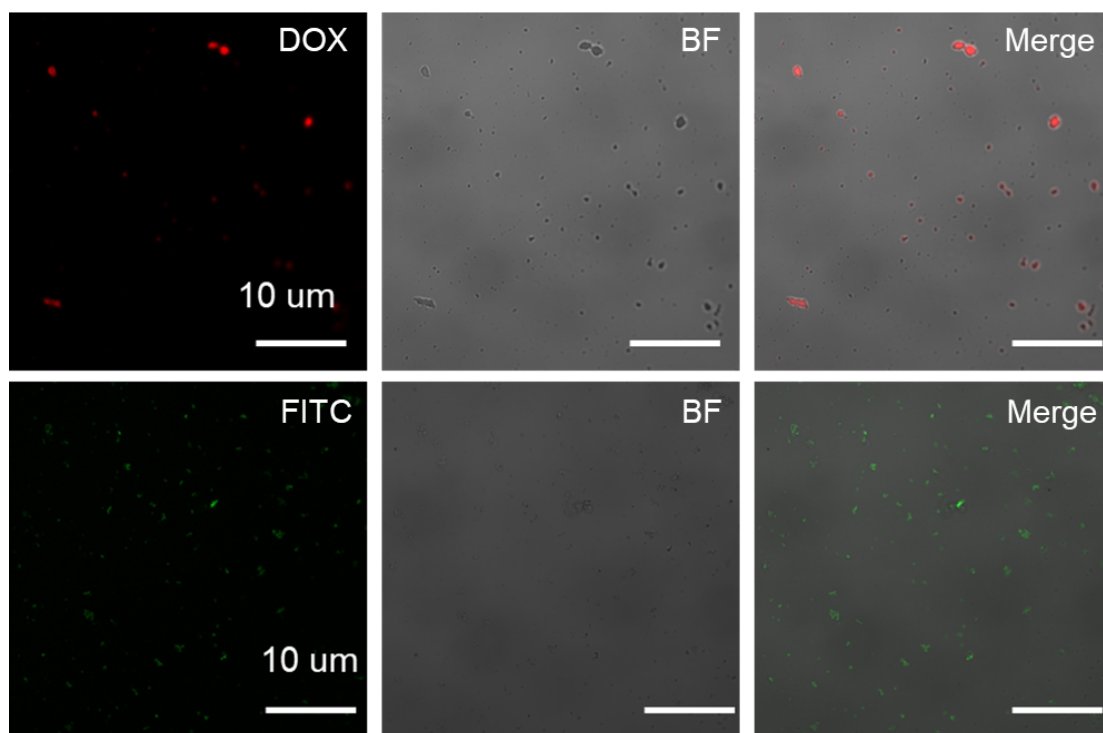

**Figure S11.** Confocal assessment of the post-functionalized nanomaterials.

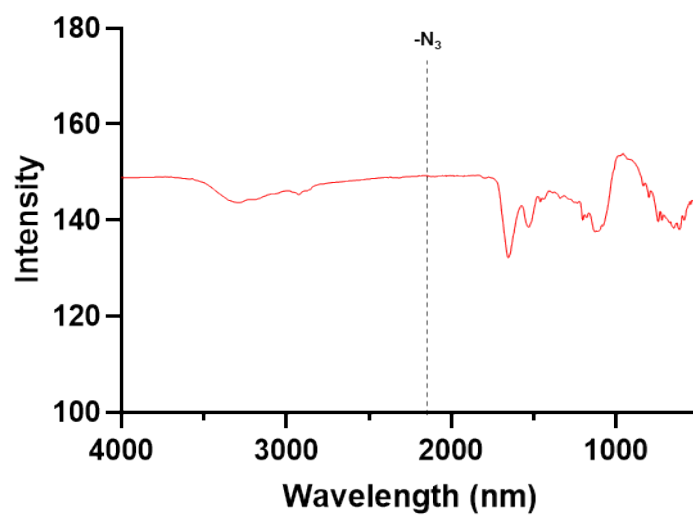

**Figure S12.** FT-IR spectrum of the CPN-PEG-FITC.

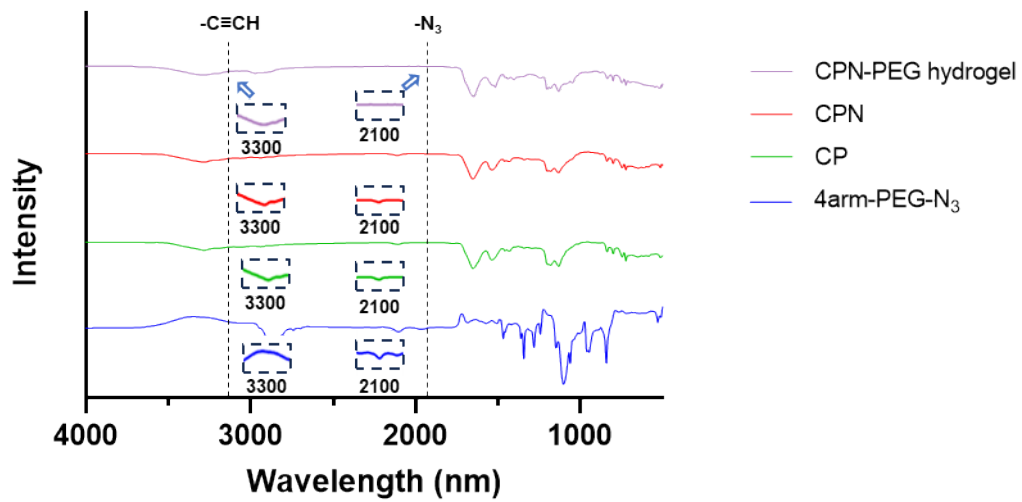

**Figure S13.** FT-IR analysis of CP, CPN, CPN-PEG hydrogel, and 4-arm-PEG-N<sub>3</sub>.

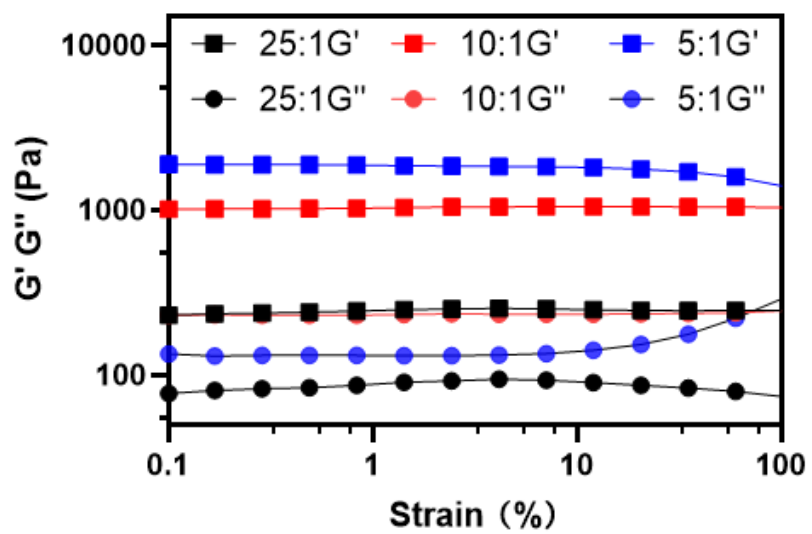

**Figure S14.** Strain sweep rheology of hydrogels with different cross-linking ratios.

CPN-PEG hydrogel

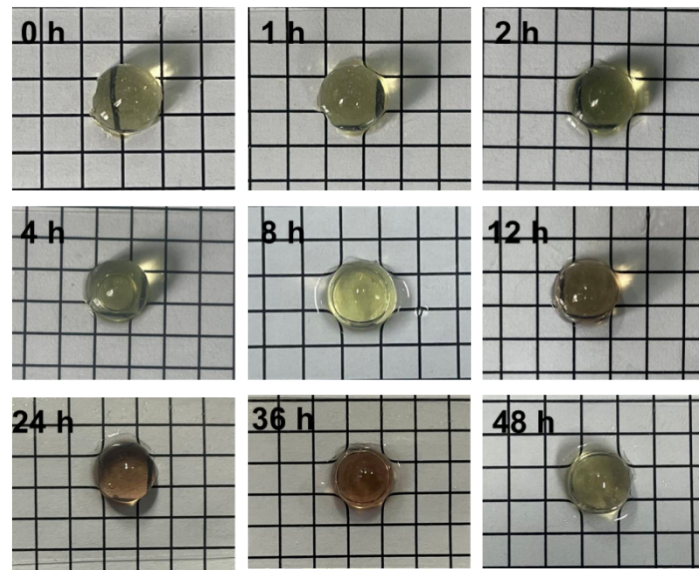

PEG hydrogel

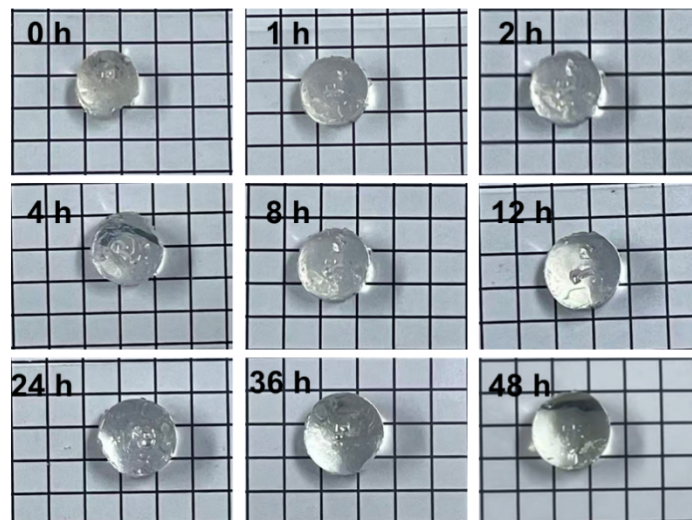

**Figure S15.** Swelling profiles of CPN-PEG hydrogel and PEG-hydrogel over a 48-hour period.

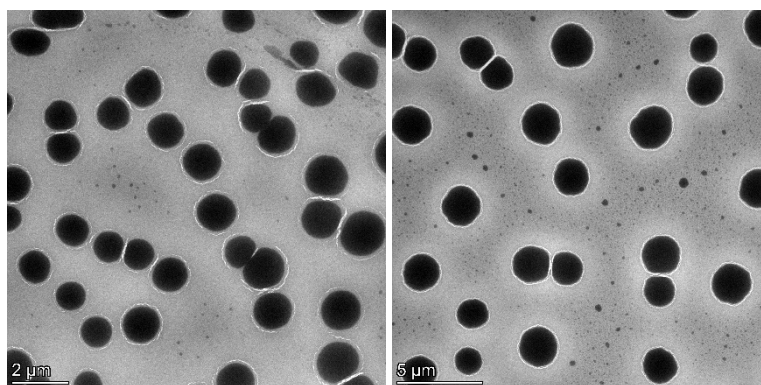

**Figure S16.** Transmission electron microscopy (TEM) images of the CPN-PEG hydrogel network.

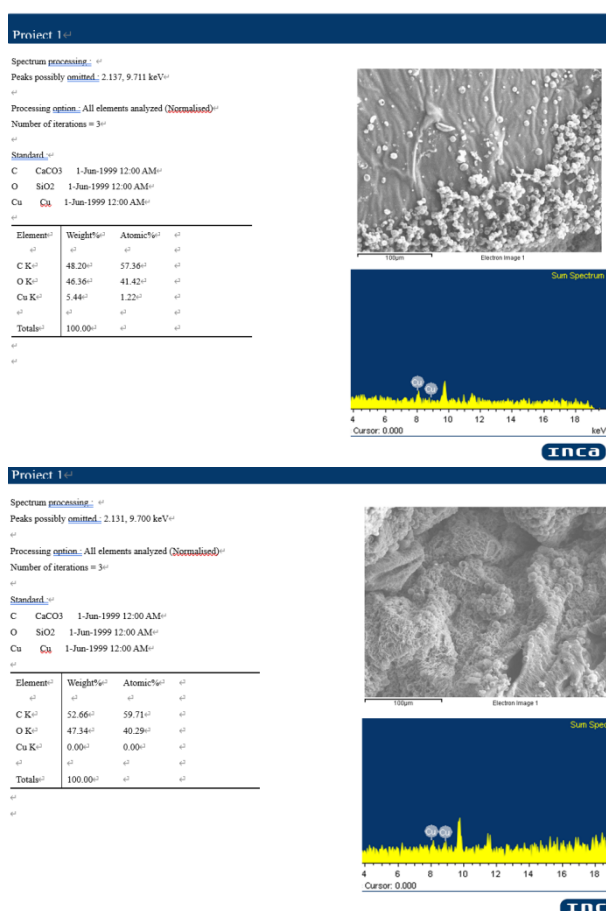

**Figure S17.** EDS spectra of the hydrogel surface before (top) and after (bottom) washing with EDTA and PBS.

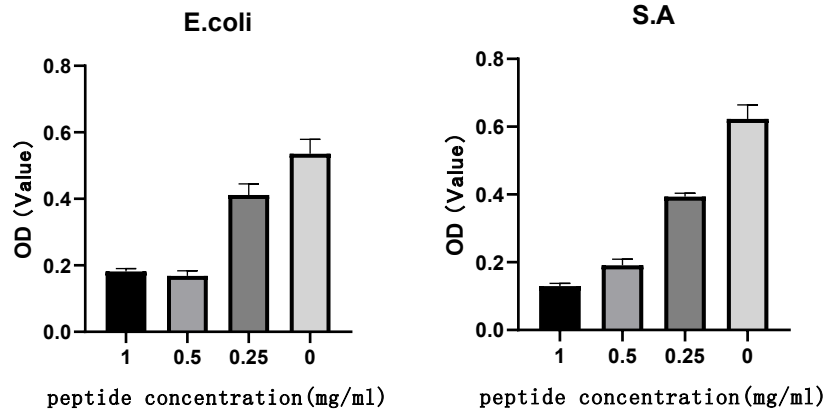

**Figure S18.** Antibacterial activity of the CP against *E. coli* and *S. Aureus*, quantified by OD<sub>600</sub> measurements.

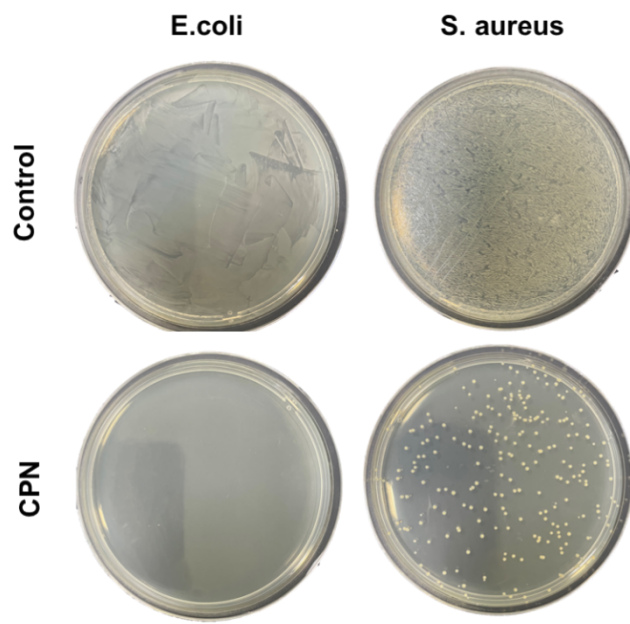

**Figure S19.** Antibacterial activity of the CPN against E. coli and S. Aureus by the spread plate method.

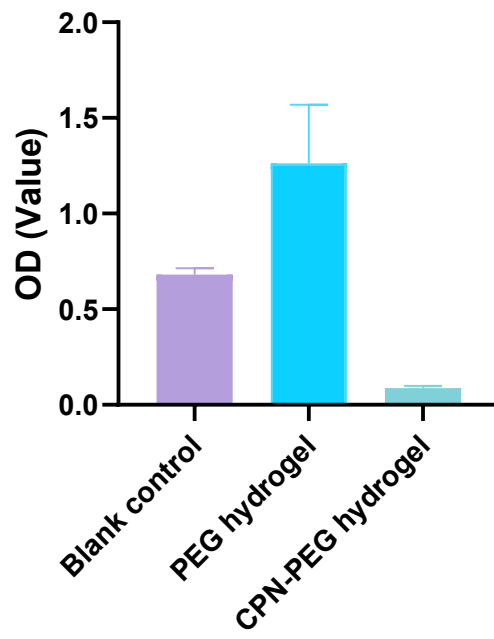

**Figure S20.** Antibacterial activity of the hydrogel against *E. coli*, quantified by OD<sub>600</sub> measurements.

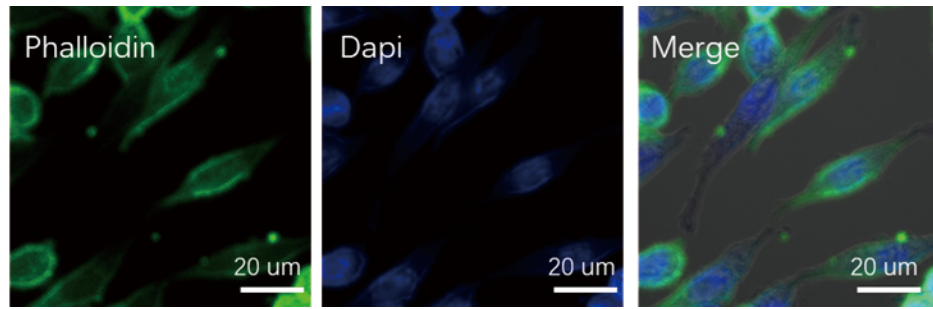

**Figure S21.** Viability and cytoskeletal integrity of L929 cells co-cultured with hydrogel extracts, as demonstrated by Phalloidin (for F-actin) and DAPI (for nuclei) staining.

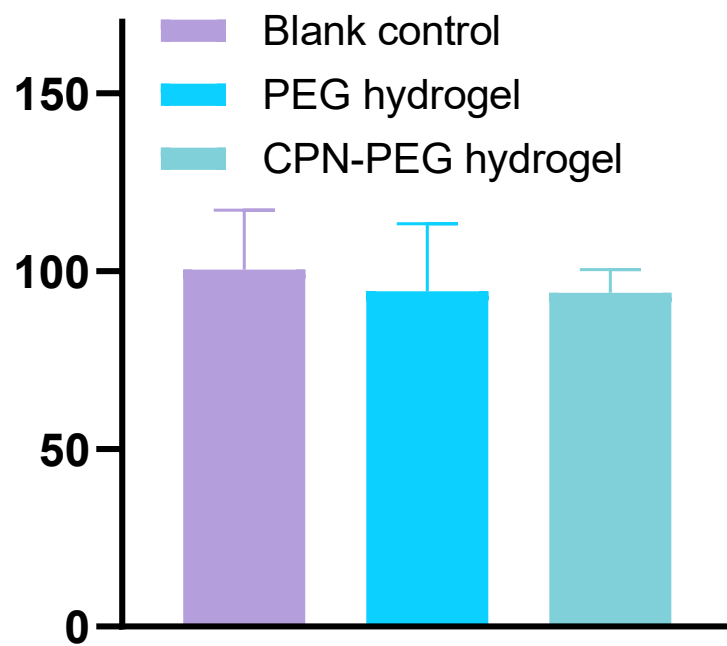

**Figure S22.** Viability of L929 cells co-cultured with CPN-PEG hydrogel, PEG-hydrogel, and the control group, assessed by CCK-8 assay.

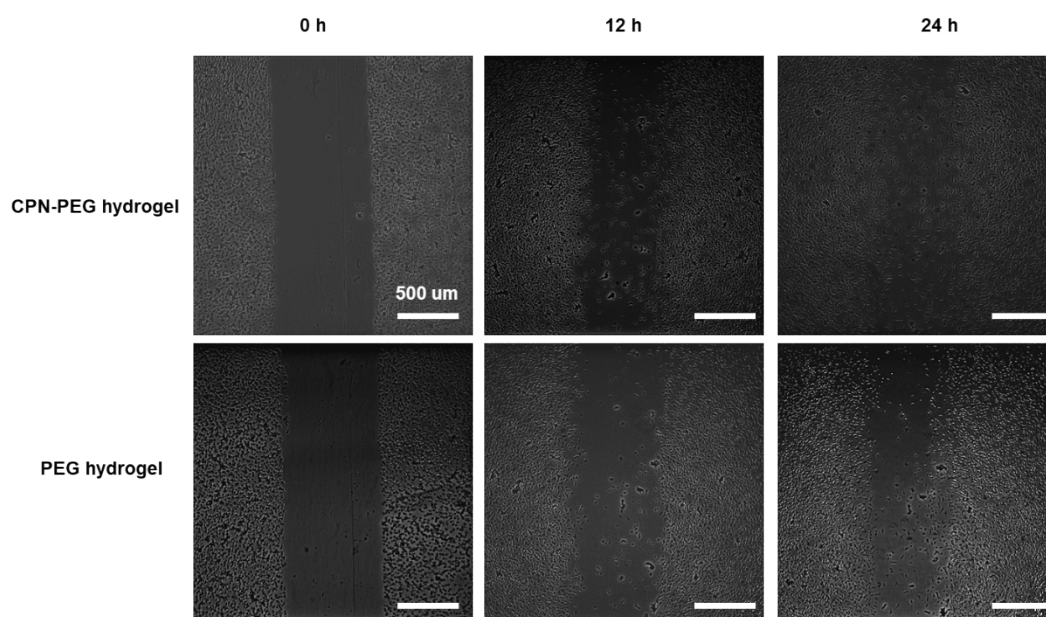

**Figure S23.** Cell migration of L929 cells after co-culture with CPN-PEG hydrogel and PEG-hydrogel extracts, assessed by scratch assay at 12 h and 24 h time points.

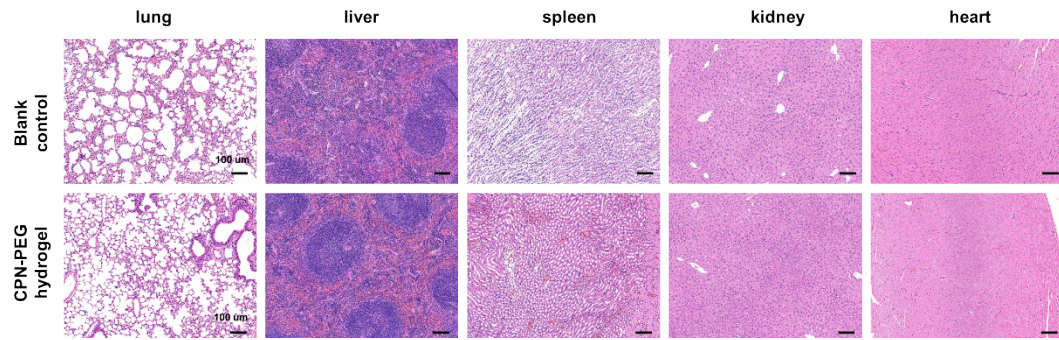

**Figure S24.** H&E staining of heart, liver, spleen, lung, and kidney sections from the blank control and CPN-PEG hydrogel groups after 12 days of experimentation.
